# Supplementary material for: Roles of mothers and fathers in supporting child physical activity: a cross-sectional mixed-methods study
Source: PubMed Central journal article supplement (PMC5781024; doi:10.1136/bmjopen-2017-019732), 2018-01-21
Supplement: bmjopen-2017-019732supp001.pdf [file bmjopen-2017-019732supp001.pdf]

**Table S1 Number of mothers and fathers who were eligible for and recruited to the interview study**

| No. | Sub-group description     | N parents eligible in each sub-group |            |            | N parents recruited in each sub-group |           |           |
|-----|---------------------------|--------------------------------------|------------|------------|---------------------------------------|-----------|-----------|
|     |                           | Total                                | Mothers    | Fathers    | Total                                 | Mothers   | Fathers   |
| 1   | Low MVPA, low SED boys    | 31                                   | 20         | 11         | 6                                     | 4         | 2         |
| 2   | High MVPA, low SED boys   | 116                                  | 82         | 34         | 6                                     | 3         | 3         |
| 3   | Low MVPA, high SED boys   | 67                                   | 51         | 16         | 7                                     | 5         | 2         |
| 4   | High MVPA, high SED boys  | 63                                   | 48         | 15         | 6                                     | 3         | 3         |
| 5   | Low MVPA, low SED girls   | 69                                   | 48         | 21         | 6                                     | 3         | 3         |
| 6   | High MVPA, low SED girls  | 86                                   | 67         | 19         | 6                                     | 4         | 2         |
| 7   | Low MVPA, high SED girls  | 138                                  | 111        | 27         | 7                                     | 4         | 3         |
| 8   | High MVPA, high SED girls | 55                                   | 37         | 18         | 7                                     | 5         | 2         |
|     | <b>Total</b>              | <b>625</b>                           | <b>464</b> | <b>161</b> | <b>51</b>                             | <b>31</b> | <b>20</b> |

**Table S2 Frequency of reporting which parent supports child activity by parent and separately by child gender**

|                                                |              | Parent gender         |                         | Chi-squared p-value<br>for difference | Child gender         |                       | Chi-squared p-value<br>for difference |
|------------------------------------------------|--------------|-----------------------|-------------------------|---------------------------------------|----------------------|-----------------------|---------------------------------------|
|                                                |              | Males<br>(N=264)<br>% | Females<br>(N=680)<br>% |                                       | Boys<br>(N=427)<br>% | Girls<br>(N=517)<br>% |                                       |
| <b>Supports child activity during the week</b> | Mother       | 26.9                  | 57.4                    | <0.001                                | 44.5                 | 52.4                  | 0.04                                  |
|                                                | Father       | 16.7                  | 2.9                     |                                       | 6.6                  | 7.0                   |                                       |
|                                                | Both parents | 56.4                  | 39.7                    |                                       | 48.9                 | 40.6                  |                                       |
| <b>Supports child activity at the weekend</b>  | Mother       | 8.3                   | 30.7                    | <0.001                                | 21.1                 | 27.3                  | 0.02                                  |
|                                                | Father       | 26.9                  | 14.1                    |                                       | 20.8                 | 15.1                  |                                       |
|                                                | Both parents | 64.8                  | 55.1                    |                                       | 58.1                 | 57.6                  |                                       |
| <b>Who should support child activity</b>       | Mother       | 1.1                   | 6.9                     | 0.001                                 | 4.2                  | 6.0                   | 0.07                                  |
|                                                | Father       | 1.5                   | 0.7                     |                                       | 1.6                  | 0.4                   |                                       |
|                                                | Both parents | 97.3                  | 92.4                    |                                       | 94.1                 | 93.6                  |                                       |
